# Supplementary material for: A Spotlight on Rad52 in Cyanidiophytina (Rhodophyta): A Relic in Algal Heritage
Source: PubMed Central journal article supplement (PMC6410040; doi:10.3390/plants8020046), 2019-02-19
Supplement: plants-08-00046-s001.pdf [file plants-08-00046-s001.pdf]

**Table S1.** Accession numbers of RAD52 amino acid sequences used in this study.

| <b>Taxa</b>                                    | <b>GenBank ID</b> |
|------------------------------------------------|-------------------|
| <b>RAD52</b>                                   |                   |
| <i>Albugo candida</i>                          | 635369772         |
| <i>Albugo laibachii</i>                        | 325180256         |
| <i>Aphanomyces invadans</i>                    | 673048395         |
| <i>Arcobacter butzleri</i>                     | 315478862         |
| <i>Blastomyces gilchristii</i>                 | 261192601         |
| <i>Bos taurus</i>                              | 528951193         |
| <i>Calliarthron tuberculosum</i>               | SRP005182         |
| <i>Campylobacter curvus</i>                    | 516863234         |
| <i>Campylobacter showae</i>                    | 489037738         |
| <i>Candidatus Phaeomarinobacter ectocarpii</i> | 918662481         |
| <i>Cyanidioschyzon merolae</i>                 | 544217672         |
| <i>Danio rerio</i>                             | 66269435          |
| <i>Ectocarpus siliculosus</i>                  | 298704860         |
| <i>Emiliana huxleyi</i>                        | 551599108         |
| <i>Encephalitozoon cuniculi</i>                | 85014303          |
| <i>Entamoeba histolytica</i>                   | 67476176          |
| <i>Entamoeba invadens</i>                      | 471202697         |
| <i>Entamoeba nuttali</i>                       | 672809564         |
| <i>Galdieria sulphuraria</i> IPPAS P507        | MK317925          |
| <i>Galdieria sulphuraria</i> IPPAS P503        | MK21733250        |
| <i>Galdieria sp.</i> ACUF074                   | MK217340          |
| <i>Gallus gallus</i>                           | 730466            |
| <i>Gracilaria chorda</i>                       | NBIV01000177      |
| <i>Homo sapiens</i>                            | 863018            |
| <i>Hyphomicrobium denitrificans</i>            | 505409238         |
| <i>Kuraisha capsulata</i>                      | 584391207         |
| <i>Mus musculus</i>                            | 261824011         |
| <i>Naegleria gruberi</i>                       | 290981385         |
| <i>Phaeodactylum tricornutum</i>               | 219126773         |
| <i>Phytophthora nicotianae</i>                 | 970651832         |
| <i>Phytophthora parasitica</i>                 | 566015423         |
| <i>Plasmopara halstedii</i>                    | 953492183         |
| <i>Rhizopus microsporus</i>                    | 729702307         |
| <i>Saprolegnia diclina</i>                     | 669164116         |
| <i>Saprolegnia parasitica</i>                  | 813177361         |
| <i>Schizophyllum commune</i>                   | 302678737         |
| <i>Schizosaccharomyces pombe</i>               | 19112088          |
| <i>Spirochaeta sp.</i>                         | 917473204         |

|                          |           |
|--------------------------|-----------|
| <i>Synechococcus sp.</i> | 494162898 |
|--------------------------|-----------|

| Taxa                            | GenBank ID |
|---------------------------------|------------|
| <b>RAD52</b>                    |            |
| <i>Thalassiosira oceanica</i>   | 397635710  |
| <i>Thalassiosira pseudonana</i> | 220968365  |
| <i>Vittaforma corneae</i>       | 667640414  |
| <i>Wickerhamomyces ciferrii</i> | 754409763  |
| <b>RAD59</b>                    |            |
| <i>Bos taurus</i>               | 61864423   |
| <i>Chrysochromulina sp.</i>     | 922864786  |
| <i>Gallus gallus</i>            | 45383087   |
| <i>Guillardia theta</i>         | 551643257  |
| <i>Homo sapiens</i>             | 21717826   |
| <i>Kluyveromyces lactis</i>     | 49643317   |
| <i>Mus musculus</i>             | 13385116   |
| <i>Pan troglodytes</i>          | 55645233   |
| <i>Saccharomyces cerevisiae</i> | 6320144    |

**Table S2.** Accession number of RAD52 nucleotide sequences from Cyanidiophyceae used in this study.

| Strain                         | Strain code | Accession number |
|--------------------------------|-------------|------------------|
| <i>Galdieria sulphuraria</i>   | ACUF141G    | MK217324         |
|                                | ACUF141Y    | MK217328         |
|                                | ACUF141DG   | MK217331         |
|                                | ACUF142     | MK217329         |
|                                | ACUF388     | MK217344         |
|                                | ACUF402     | MK217342         |
|                                | ACUF427     | MK217345         |
|                                | ACUF455     | MK217343         |
|                                | SAG108.79   | MK217327         |
|                                | SAG21.92    | MK217346         |
| <i>Galdieria sp.</i>           | IPPAS_P503  | MK217325         |
|                                | CCMEE5720   | MK217326         |
|                                | CCMEE5639   | MK217330         |
|                                | CCMEE5716   | MK217332         |
|                                | CCMEE5658   | MK217333         |
|                                | CCMEE5664   | MK217334         |
|                                | CCMEE5665   | MK217335         |
|                                | CCMEE5672   | MK217336         |
|                                | CCMEE5680   | MK217337         |
|                                | CCMEE5715   | MK217338         |
|                                | CCMEE5712   | MK217339         |
|                                | ACUF074     | MK217340         |
|                                | IPPAS_P502  | MK217341         |
|                                | THAL033     | MK217347         |
| <i>Cyanidioschyzon merolae</i> | 10D         | XM_005538923     |
